# Supplementary material for: Anti-Vascular Endothelial Growth Factor C Antibodies Efficiently Inhibit the Growth of Experimental Clear Cell Renal Cell Carcinomas
Source: MDPI journal article supplement (doi:10.3390/cells10051222), 2021-05-17
Supplement: s1 [file s1]

Supplementary Material

# Anti-Vascular Endothelial Growth Factor C Antibodies Efficiently Inhibit the Growth of Experimental Clear Cell Renal Cell Carcinomas

Aurore Dumond <sup>1,†</sup>, Christopher Montemagno <sup>1,2,†</sup>, Valérie Vial <sup>1</sup>, Renaud Grépin <sup>1</sup> and Gilles Pages <sup>1,2,\*</sup>

<sup>1</sup> Département de Biologie Médicale, Centre Scientifique de Monaco, 98000 Monaco, Monaco; adu-mond@centrescientifique.mc (A.D.); cmontemagno@centrescientifique.mc (C.M.); vial@centrescientifique.mc (V.V.); grepin.renaud@me.com (R.G.)

<sup>2</sup> Institute for Research on Cancer and Aging of Nice, Université Cote d'Azur, CNRS UMR 7284, INSERM U1081, Centre Antoine Lacassagne, 06189 Nice, France

\* Correspondence: gpages@unice.fr; Tel.: +377-97-77-44-05

† Equally contributed to this work.

MHLLGFFSVACSLAAALLPGPREAPAAAAAFESGLDLSDAEPDAGEATAYASKDLEEQLRSVSSV  
DELMTVLYPEYWKMYKCQLRKGWQHNRQANLNSRTEETIKFAAAHYNTEILKSIDNEWKTKO  
CMPREVCIDVGKEFVATNTEFKPPCVSVYRCGGCCNSEGLOCMNTSTSYLSKTLFEITVPLSOQPKP  
VTISFANHTSCRCMSKLDVYRQVHSIIRSLPATLPQCQAANKTCPTNYMWNNHICRCLAQEDFM  
FSSDAGDDSTDGFHDICGPNKELDEETCQCVCRAGLRPASCGPHKELDRNSCQCVCCKNKLFPSC  
GANREFDENTCQCVCCKRTCPRNQPLNPGKCACTESPQKCLLKGGKFFHHQTCSCYRRPCTNRQ  
KACEPGFSYSEEVCRCPVSYWKRQMSL

XXX Signal peptide

XXX propeptide

XXX Mature peptide

**Figure S1.** The mature peptide (underlined) was chosen for the immunization protocol.

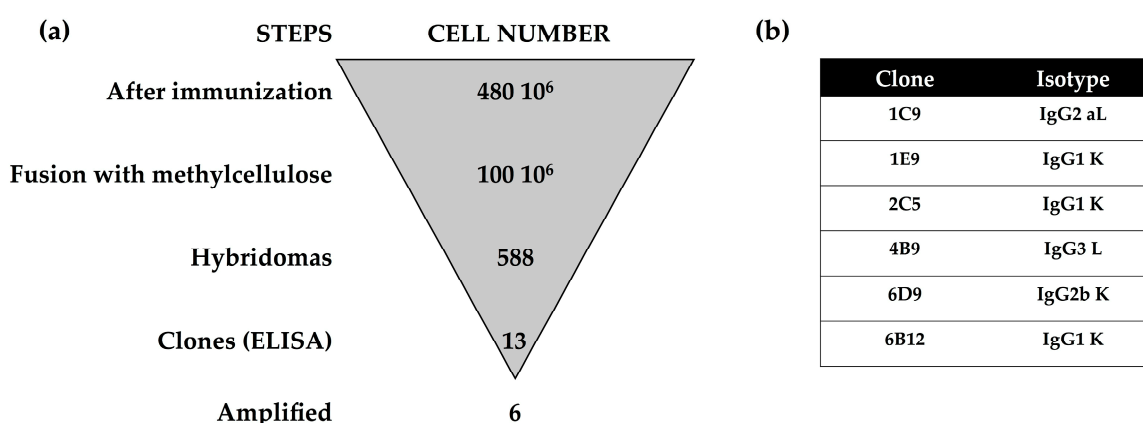

**Figure S2.** Description of the flow chart for the selection of the relevant hybridomas. (a) The bottlenecked, step-by-step procedure to select the best hybridomas (three rounds of subcloning). (b) Isotyping of the antibodies produced by the selected hybridomas.

(a) Light chain nucleotide sequence  
 GATGTTGTGATGACCCAACTCCACTCTCCCTGACTGTCTGAGATCAAGCCTCCATCTCTTGAGATCTAGTCAGAGCCTTGT  
 ACACAGTAATGGAAACACCTATTTACATTGGTACCTGCAGAAGCCAGGCCAGTCTCCGAAAGCTCCTGATCTACAAAGTTTTCAACCGA  
 TTGTCTGGGGTCCAGACAGGTTCAGTGGCAGTGGATCAGGGACAGATTTACACTCAAGATCAGTAGAGTGGAGGCTGAGGATCTG  
 GGAGTTTATTTCTGCTCTCAAATAACGCATGTTCCGTGGACGTTCCGTGGAGGCACCAAGTTGGAATCAAA

Heavy chain nucleotide sequence  
 CCAGGCCCAACTGCGGCAGCCTGGGGCTGAACTGGTGAAGCCTGGGGCTTCAGTGAAGCTGTCCTGCAAGGCTTCTGGCTACACCTT  
 CATCAGCTACTGGATGCACTGGGTGAAAACAGAGGCCTGGACAAGGCCTTGAGTGGATTGGAGAGATTAATCCTAGCAACGGTCGTAC  
 TAACTACAATGAGAAGTTCAAGAGCAAGGCCACACTGACTGTAGACAGATCCTCCAGCACAGCCTACATGCAACTCAGCAGCCTGA  
 CATCTGAGGACTCTGCGGTCTATTACTGTGCAAGCACCTCTCTTTTACTATGCTATGAATTACTGGGGTCAAGGAACCTCAGTCACC  
 GTCTCCTCA

(b) Light chain protein sequence

| CDR1                                                                                                           | CDR2 | CDR3 |
|----------------------------------------------------------------------------------------------------------------|------|------|
| DVVMQTPLSLTVSLGDQASISCRSSQSLVHSNGNTYLHWYLQKPGQSPKLLIYKVFNRISGVDPDRFSGSGSDFTLKISRVEAEDLGVYFCSQNTHPVPTFGGGTKLEIK |      |      |

Heavy chain protein sequence

| CDR1                                                                                                                   | CDR2 | CDR3 |
|------------------------------------------------------------------------------------------------------------------------|------|------|
| QAQLRQPGAELVKPGASVKLSCKASGYTFISYWMHWVKQRPGQGLEWIGIEINPSNGRTNYNEKFKSKATLTVDSSSTAYMQLSSLTSEDSAVYYCASTSLFYAMNYWGQGSTVTVSS |      |      |

**Figure S3.** DNA and protein sequences of the variable light and heavy chains of the 1E9 antibodies: (a) DNA sequences; (b) protein sequences.

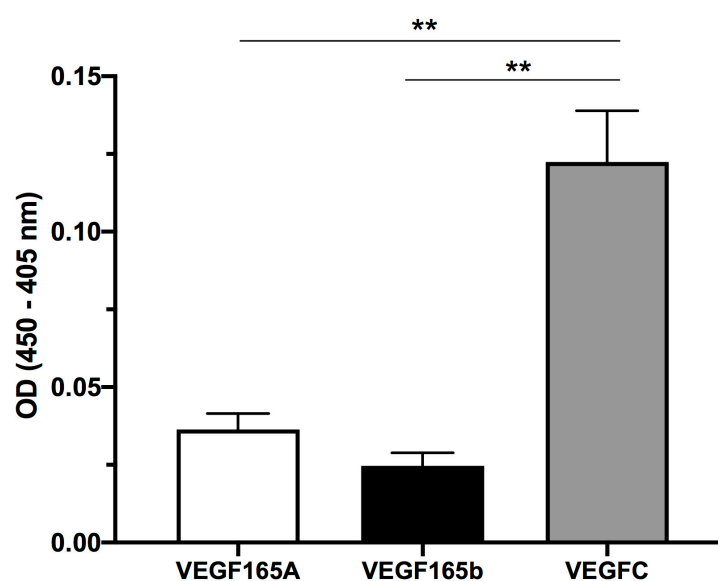

**Figure S4.** Specificity of 1E9 antibodies: an amount of 100 ng of recombinant VEGF165A, VEGF165b or VEGFC was immobilized overnight in a 96-well plate. 1E9 antibodies (10 µg/mL) were incubated for 1h, and revelation was performed with TMB substrate after incubation with a goat anti-human HRP antibody. OD was assessed at 450 nm and 405 nm after the addition of HCl solution to stop the reaction.  $n = 4$ ; \*\*,  $p < 0.01$ .

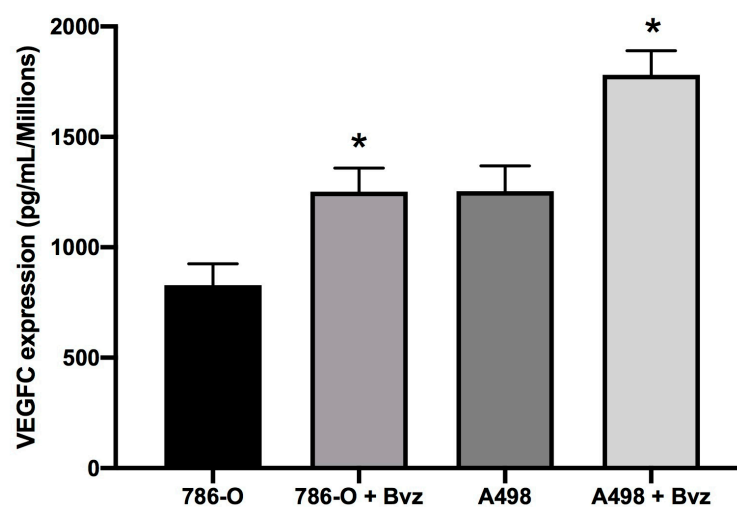

**Figure S5.** Bevacizumab increased VEGFC expression in 786-O and A498 cells. RCC cells were seeded in 6-well plates and treated for 48 hours with bevacizumab (BVZ, 10  $\mu$ g/mL). VEGFC levels were evaluated by ELISA with the R&D systems ELISA kit according to the manufacturer's recommendations.  $n = 4$ ; \*,  $p < 0.05$  vs. untreated cells.

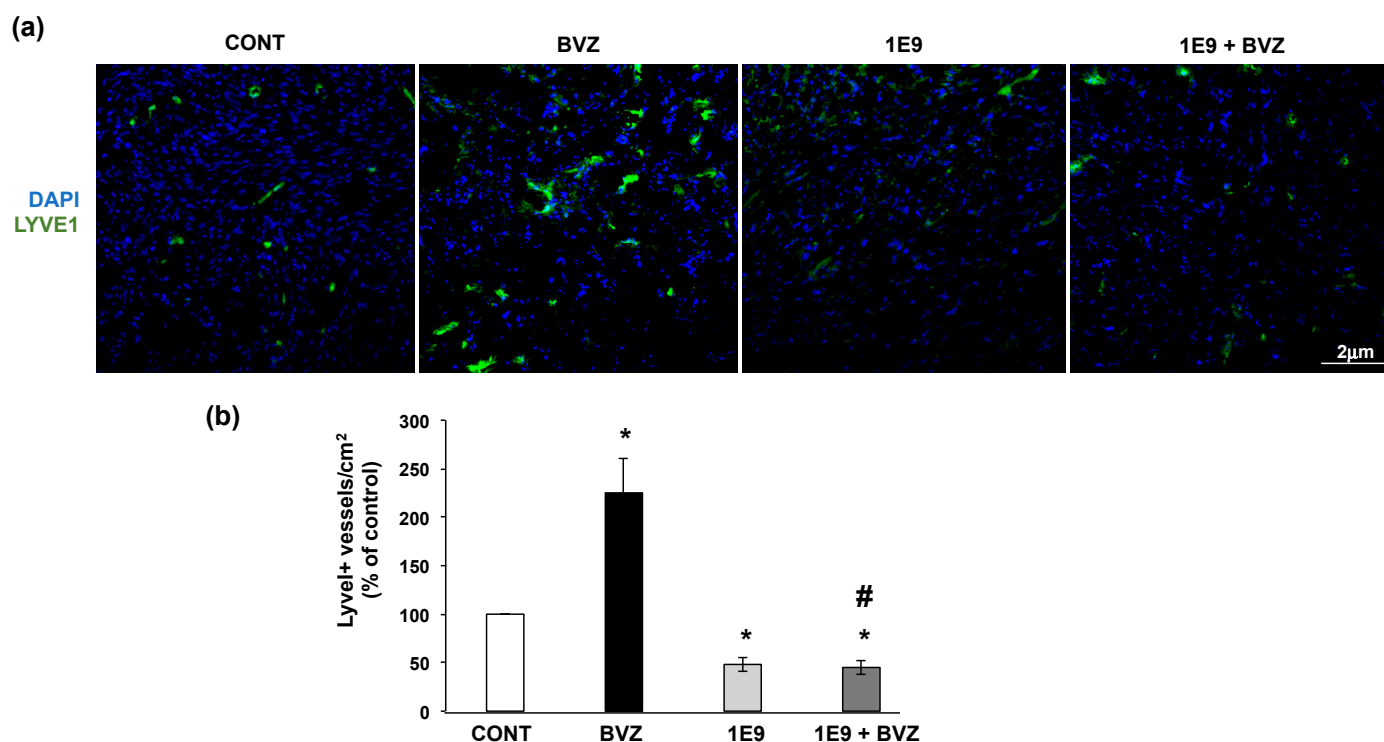

**Figure S6.** 1E9 antibodies prevent the bevacizumab-dependent development of lymphatic vessels (a). Lymphatic vessels were revealed by immunostaining using anti-LYVE1 antibodies. Tumor sections were counterstained with 40,6-diamidino-2-phenylindole (DAPI) (nucleus, blue) (b). Quantification of the number of lymphatic vessels is shown in (a). Statistics are indicated; \*,  $p < 0.05$  as compared to control; #,  $p < 0.05$  as compared to bevacizumab condition.

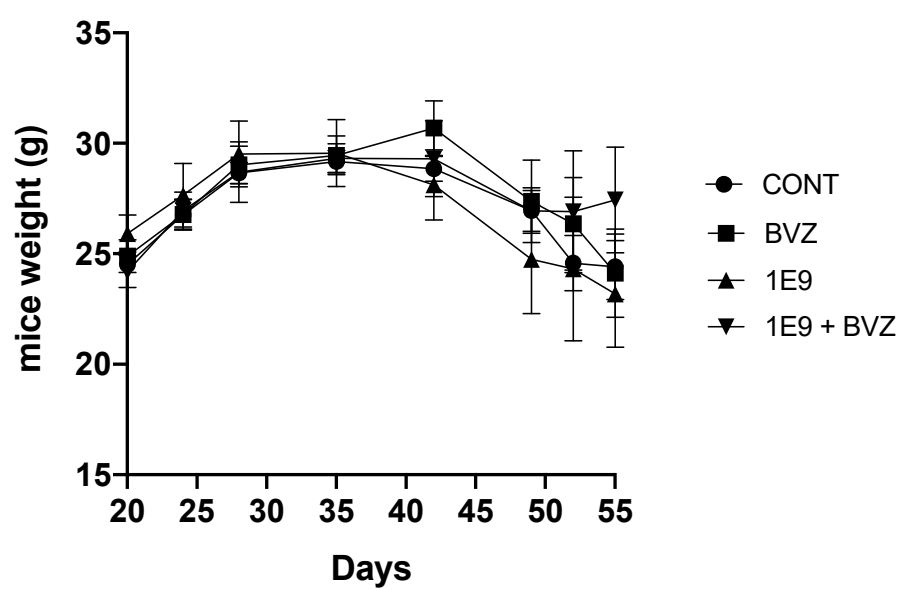

Figure S7. Body weight of mice throughout the experiment.
